# Supplementary material
Source: publisher figshare collection journal article supplement (https://acs.figshare.com/ndownloader/files/5070928)
Supplement: Supplementary file 1 [file 5070928]

**Supporting Information I.** MANOVA and Hotelling  $T^2$  Tests for the Overall Differences between Two Years and Results of Student's  $t$  Tests for the Significance of Between-Years Differences in Each Tocopherol.

| <b>Summary of MANOVA tests</b>                                                                                                                                                |                                                      |                                                       |                                         |
|-------------------------------------------------------------------------------------------------------------------------------------------------------------------------------|------------------------------------------------------|-------------------------------------------------------|-----------------------------------------|
| Wilks' Lambda = 0.60787, $F(14.312) = 6.298$ , $p < 0.0000$                                                                                                                   |                                                      |                                                       |                                         |
| <b>Summary of Hotelling <math>T^2</math> tests (lower triangle) and univariate student's <math>t</math> tests (upper triangle) for the differences between pair of groups</b> |                                                      |                                                       |                                         |
|                                                                                                                                                                               | 2001                                                 | 2002                                                  | 2003                                    |
| 2001                                                                                                                                                                          | -----                                                | $\beta$ -T, $\gamma$ -T, $\beta$ -TTR                 | $\gamma$ -T, $\beta$ -TTR, $\delta$ -T  |
| 2002                                                                                                                                                                          | $T^2 = 32.76$<br>$F_{(7.10)} = 4.43$<br>$p < 0.0001$ | -----                                                 | $\gamma$ -T, $\gamma$ -TTR, $\delta$ -T |
| 2003                                                                                                                                                                          | $T^2 = 48.59$<br>$F_{(7.10)} = 6.55$<br>$p < 0.0001$ | $T^2 = 78.85$<br>$F_{(7.10)} = 10.62$<br>$p < 0.0001$ | -----                                   |

Lower triangle:  $F_{\text{obs}}$  values (Hotelling  $T^2$ ) and level of significance; Upper triangle: tocopherols for which  $t_{\text{obs}}$  values were significant ( $p < 0.05$ ) on the univariate test of the hypothesis that two group means are equal.

**Supporting Information II.** MANOVA and Hotelling  $T^2$  Tests for the Overall Differences between Two Cultivars' Origins and Results of Student's  $t$  Tests for the Significance of Between-Origins differences in Each Tocopherol.

| <b>Summary of MANOVA tests</b>                                                                                                                                                |                                                          |                                                           |                                                                                       |                                                                       |
|-------------------------------------------------------------------------------------------------------------------------------------------------------------------------------|----------------------------------------------------------|-----------------------------------------------------------|---------------------------------------------------------------------------------------|-----------------------------------------------------------------------|
| Wilks' Lambda = 0.26978, $F_{(21,445)} = 12.269$ , $p < 0.0001$                                                                                                               |                                                          |                                                           |                                                                                       |                                                                       |
| <b>Summary of Hotelling <math>T^2</math> tests (lower triangle) and univariate student's <math>t</math> tests (upper triangle) for the differences between pair of groups</b> |                                                          |                                                           |                                                                                       |                                                                       |
|                                                                                                                                                                               | USA                                                      | ITALY                                                     | SPAIN                                                                                 | OTHERS                                                                |
| USA                                                                                                                                                                           | -----                                                    | $\alpha$ -T, $\alpha$ -TTR,<br>$\gamma$ -T, $\gamma$ -TTR | $\alpha$ -T, $\alpha$ -TTR,<br>$\beta$ -T, $\gamma$ -T,<br>$\gamma$ -TTR, $\delta$ -T | $\alpha$ -T, $\alpha$ -TTR,<br>$\beta$ -T, $\gamma$ -T, $\delta$ -T   |
| ITALY                                                                                                                                                                         | $T^2 = 113.689$<br>$F_{(7.55)} = 14.64$<br>$p < 0.0001$  | -----                                                     | $\alpha$ -TTR, $\beta$ -T,<br>$\delta$ -T                                             | $\alpha$ -T, $\alpha$ -TTR, $\beta$ -T,<br>$\gamma$ -TTR, $\delta$ -T |
| SPAIN                                                                                                                                                                         | $T^2 = 89.676$<br>$F_{(7.70)} = 11.800$<br>$p < 0.0001$  | $T^2 = 71.1636$<br>$F_{(7.79)} = 9.4484$<br>$p < 0.0001$  | -----                                                                                 | $\alpha$ -T, $\gamma$ -TTR, $\delta$ -T                               |
| OTHERS                                                                                                                                                                        | $T^2 = 60.8194$<br>$F_{(7.70)} = 8.0026$<br>$p < 0.0001$ | $T^2 = 122.024$<br>$F_{(7.79)} = 16.201$<br>$p < 0.0001$  | $T^2 = 97.4714$<br>$F_{(7.94)} = 13.089$<br>$p < 0.0001$                              | -----                                                                 |

Lower triangle:  $F_{\text{obs}}$  values (Hotelling  $T^2$ ) and level of significance; Upper triangle: tocopherols for which  $t_{\text{obs}}$  values were significant ( $p < 0.05$ ) on the univariate test of the hypothesis that two group means are equal.
